# Supplementary material for: Electrospun polarity-controlled molecular orientation for synergistic performance of an artifact-free piezoelectric anisotropic sensor
Source: Royal Society of Chemistry journal article supplement (doi:10.1039/d4mh00540f), 2024-01-01
Supplement: d4mh00540f1.pdf [file d4mh00540f1.pdf]

## †Electronic Supporting Information (ESI)

### Electrospun Polarity Controlled Molecular Orientation for Synergistic Performance of Artifact Free Piezoelectric Anisotropic Sensor †

*Ajay Kumar*<sup>a</sup>, *Varun Gupta*<sup>a</sup>, *Pinki Malik*<sup>a</sup>, *Shanker Ram*<sup>b</sup> and *Dipankar Mandal*<sup>a,\*</sup>

<sup>a</sup> Quantum Materials and Devices Unit, Institute of Nano Science and Technology, Knowledge City, Sector 81, Mohali 140306, India

<sup>b</sup> Materials Science Centre, Indian Institute of Technology, Kharagpur, 721 302 WB, India

\* E-mail: dmandal@inst.ac.in

**Discussion D1: Estimating the value of dichroic ratio (R), minimum fraction of completely oriented dipoles ( $f_m$ ) and range of angle  $\delta$  formed by their long axis with transition dipole moment vector.<sup>1,2</sup>**

$$R = \frac{\Delta A_{parallel}}{\Delta A_{perpendicular}} \quad (1)$$

$$if R > 1: \cot^{-1}(\sqrt{R}/2); f_m = \frac{R-1}{R+2} \quad (2)$$

$$if R < 1: \cot^{-1}(\frac{\sqrt{R}}{2}) \leq \delta \leq 90^\circ; f_m = \frac{2(1-R)}{R+2} \quad (3)$$

Table S1. Variation of the dichroic ratio (R), the minimum fraction of completely oriented dipoles ( $f_m$ ) and range of angle  $\delta$  formed by their long axis with transition dipole moment vector for corresponding vibrational modes attached to the wavenumber in positive and negative electrospinning aligned and random fibers of P(VDF-CTFE).<sup>3</sup>

| Fiber | $\nu$ (cm <sup>-1</sup> ) | approximate normal mode assignment                                                    | R    | $f_m$ | Estimated $\alpha$ interval |
|-------|---------------------------|---------------------------------------------------------------------------------------|------|-------|-----------------------------|
| PACF  | 1430                      | $\delta$ (CH <sub>2</sub> ) – w (CH <sub>2</sub> )                                    | 0.45 | 0.447 | 71.43° < $\alpha$ < 90°     |
| PACF  | 1402                      | w (CH <sub>2</sub> ) + $\nu_s$ (CC)                                                   | 2.24 | 0.292 | 0° < $\alpha$ < 53.18°      |
| PACF  | 1280                      | $\nu_s$ (CF <sub>2</sub> ) + $\nu_s$ (CC) + $\delta$ (CCC)                            | 0.64 | 0.270 | 68.16° < $\alpha$ < 90°     |
| PACF  | 1182                      | $\nu_{as}$ (CF <sub>2</sub> ) + $\rho$ (CF <sub>2</sub> ) + $\rho$ (CH <sub>2</sub> ) | 1.02 | 0.008 | 0° < $\alpha$ < 63.16°      |
| PACF  | 1073                      | $\nu_{as}$ (CC) + w (CF <sub>2</sub> ) + w (CH <sub>2</sub> )                         | 2.09 | 0.267 | 0° < $\alpha$ < 54.11°      |
| PACF  | 883                       | $\rho$ (CH <sub>2</sub> ) + $\nu_{as}$ (CF <sub>2</sub> ) + $\rho$ (CF <sub>2</sub> ) | 0.91 | 0.061 | 64.48° < $\alpha$ < 90°     |
| PACF  | 841                       | $\nu_s$ (CF <sub>2</sub> ) + $\nu_s$ (CC)                                             | 0.78 | 0.157 | 66.15° < $\alpha$ < 90°     |
| PRCF  | 1430                      | $\delta$ (CH <sub>2</sub> ) – w (CH <sub>2</sub> )                                    | 0.98 | 0.010 | 63.61° < $\alpha$ < 90°     |
| PRCF  | 1402                      | w (CH <sub>2</sub> ) + $\nu_s$ (CC)                                                   | 1.01 | 0.003 | 0° < $\alpha$ < 63.30°      |
| PRCF  | 1280                      | $\nu_s$ (CF <sub>2</sub> ) + $\nu_s$ (CC) + $\delta$ (CCC)                            | 0.95 | 0.033 | 64.01° < $\alpha$ < 90°     |
| PRCF  | 1182                      | $\nu_{as}$ (CF <sub>2</sub> ) + $\rho$ (CF <sub>2</sub> ) + $\rho$ (CH <sub>2</sub> ) | 0.97 | 0.018 | 63.75° < $\alpha$ < 90°     |
| PRCF  | 1073                      | $\nu_{as}$ (CC) + w (CF <sub>2</sub> ) + w (CH <sub>2</sub> )                         | 0.99 | 0.002 | 63.45° < $\alpha$ < 90°     |
| PRCF  | 883                       | $\rho$ (CH <sub>2</sub> ) + $\nu_{as}$ (CF <sub>2</sub> ) + $\rho$ (CF <sub>2</sub> ) | 0.95 | 0.027 | 63.90° < $\alpha$ < 90°     |
| PRCF  | 841                       | $\nu_s$ (CF <sub>2</sub> ) + $\nu_s$ (CC)                                             | 0.96 | 0.021 | 63.61° < $\alpha$ < 90°     |
| NACF  | 1430                      | $\delta$ (CH <sub>2</sub> ) – w (CH <sub>2</sub> )                                    | 0.24 | 0.679 | 76.24° < $\alpha$ < 90°     |
| NACF  | 1402                      | w (CH <sub>2</sub> ) + $\nu_s$ (CC)                                                   | 2.33 | 0.307 | 0° < $\alpha$ < 52.63°      |
| NACF  | 1280                      | $\nu_s$ (CF <sub>2</sub> ) + $\nu_s$ (CC) + $\delta$ (CCC)                            | 0.75 | 0.178 | 66.51° < $\alpha$ < 90°     |
| NACF  | 1182                      | $\nu_{as}$ (CF <sub>2</sub> ) + $\rho$ (CF <sub>2</sub> ) + $\rho$ (CH <sub>2</sub> ) | 1.04 | 0.013 | 0° < $\alpha$ < 62.99°      |
| NACF  | 1073                      | $\nu_{as}$ (CC) + w (CF <sub>2</sub> ) + w (CH <sub>2</sub> )                         | 2.01 | 0.252 | 0° < $\alpha$ < 54.63°      |
| NACF  | 883                       | $\rho$ (CH <sub>2</sub> ) + $\nu_{as}$ (CF <sub>2</sub> ) + $\rho$ (CF <sub>2</sub> ) | 0.92 | 0.052 | 64.34° < $\alpha$ < 90°     |
| NACF  | 841                       | $\nu_s$ (CF <sub>2</sub> ) + $\nu_s$ (CC)                                             | 0.93 | 0.049 | 63.57° < $\alpha$ < 90°     |
| NRCF  | 1430                      | $\delta$ (CH <sub>2</sub> ) – w (CH <sub>2</sub> )                                    | 0.98 | 0.008 | 64.28° < $\alpha$ < 90°     |
| NRCF  | 1402                      | w (CH <sub>2</sub> ) + $\nu_s$ (CC)                                                   | 0.92 | 0.056 | 64.40° < $\alpha$ < 90°     |
| NRCF  | 1280                      | $\nu_s$ (CF <sub>2</sub> ) + $\nu_s$ (CC) + $\delta$ (CCC)                            | 1.02 | 0.007 | 0° < $\alpha$ < 63.52°      |
| NRCF  | 1182                      | $\nu_{as}$ (CF <sub>2</sub> ) + $\rho$ (CF <sub>2</sub> ) + $\rho$ (CH <sub>2</sub> ) | 0.99 | 0.005 | 63.43° < $\alpha$ < 90°     |
| NRCF  | 1073                      | $\nu_{as}$ (CC) + w (CF <sub>2</sub> ) + w (CH <sub>2</sub> )                         | 0.91 | 0.058 | 63.35° < $\alpha$ < 90°     |
| NRCF  | 883                       | $\rho$ (CH <sub>2</sub> ) + $\nu_{as}$ (CF <sub>2</sub> ) + $\rho$ (CF <sub>2</sub> ) | 1.01 | 0.002 | 0° < $\alpha$ < 63.55°      |
| NRCF  | 841                       | $\nu_s$ (CF <sub>2</sub> ) + $\nu_s$ (CC)                                             | 0.98 | 0.007 | 63.57° < $\alpha$ < 90°     |

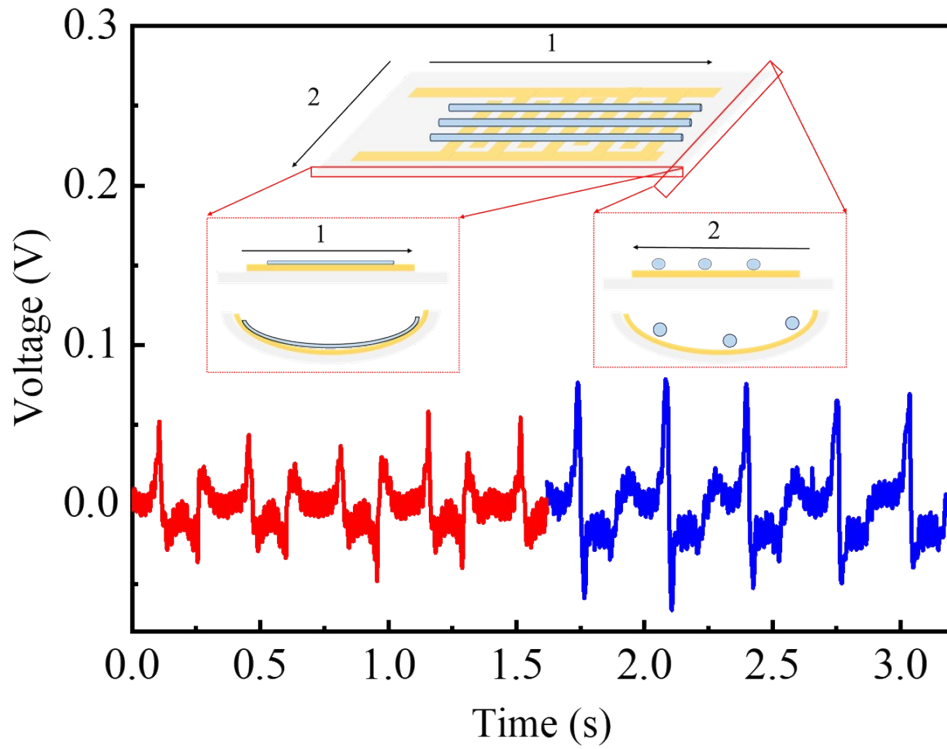

Figure S1. Voltage vs time response under different bending modes (bending angle  $60^\circ$ ) to investigate the lateral anisotropy with insets describing the corresponding bending along 1 and 2 axes.

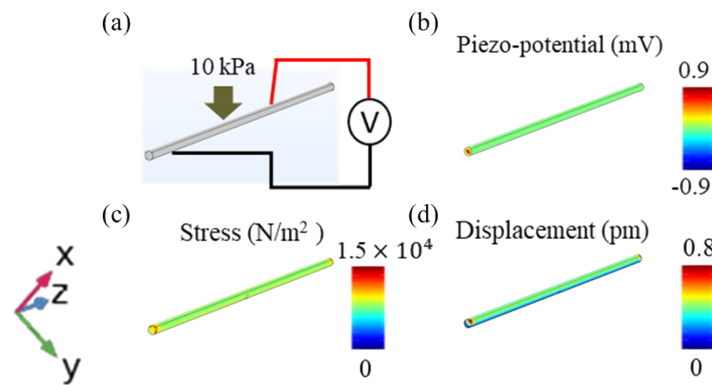

Figure S2. Finite element analysis (a) describing  $d_{32}$  mode fiber under stress with corresponding (b) piezo-potential, (c) distribution of stress and (d) displacement generated in the fiber.

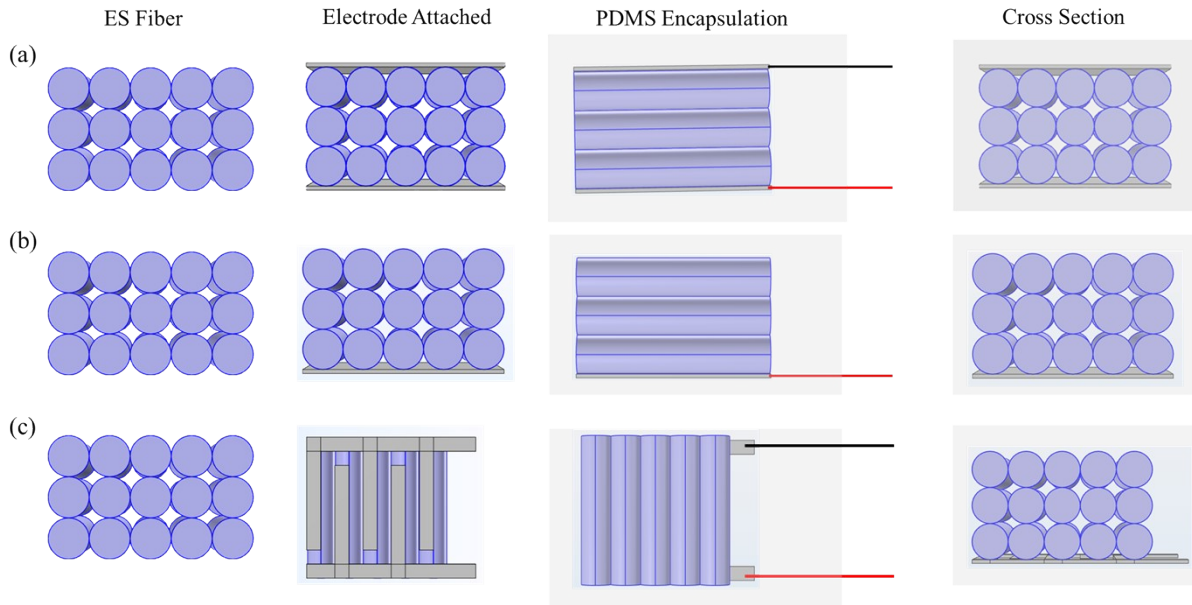

Figure S3. Schematic of the step-wise device fabrication for (a) ferroelectret, (b) triboelectric and (c) piezoelectric signal measurement. In particular, three principal steps of fabrication, viz., ES fiber arrangement, electrode attachment and PDMS encapsulation are shown. In each, the cross-section views are also illustrated to demonstrate three different types of devices, viz., ferroelectret, triboelectric and piezoelectric sensors.

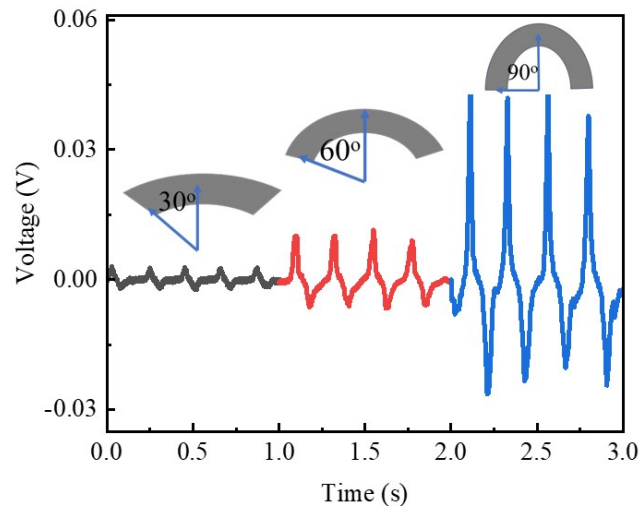

Figure S4. PENG response under different bending angles of 30°, 60° and 90°. The schematics of corresponding bending angles are shown in the inset.

## References:

1. Viola, G.; Chang, J.; Maltby, T.; Steckler, F.; Jomaa, M.; Sun, J.; Edusei, J.; Zhang, D.; Vilches, A.; Gao, S.; Liu, X.; Saeed, S.; Zabalawi, H.; Gale, J.; Song, W., Bioinspired multiresonant acoustic devices based on electrospun piezoelectric polymeric nanofibers. *ACS Appl. Mater. Interfaces* **2020**, *12*, 34643–34657.
2. Ma, X.; Liu, J.; Ni, C.; Martin, D. C.; Chase, D. B.; Rabolt, J. F., Molecular orientation in electrospun poly(vinylidene fluoride) fibers. *ACS Macro Lett.* **2012**, *1*, 428–431.
3. Wang, Z.; Sun, B.; Lu, X.; Wang, C.; Su, Z., Molecular orientation in individual electrospun nanofibers studied by polarized AFM–IR. *Macromolecules* **2019**, *52*, 9639–9645.
